# Supplementary material
Source: Springer Nature journal article supplement (https://www.springermedizin.de/resource/supplementary/12904_2011_97_MOESM1_ESM.pdf/9517546)
Supplement: MOESM1 [file 9517546]

**card headings**

**PATIENT**

- P1 age
- P2 health status
- P3 persistent symptoms of discomfort
- P4 number of associated diseases
- P5 gravity-related illnesses
- P6 refusal of care
- P7 patient's wish to end his/her life
- P8 need for transfer to hospital
- P9 patient's personal beliefs
- P10 patient's history
- P11 temperament and psychological profile
- P12 refusing food

**VALUES**

- V1 state of the art on disease and complications
- V2 certainty of the diagnosis of dementia
- V3 compliance with laws
- V4 respect of ethics
- V5 cost
- V6 internal rules
- V7 desire to end the suffering of the person
- V8 desire to end the suffering of relatives
- V9 avoid aggressive treatment
- V10 avoid producing more discomfort than comfort
- V11 conviction of the team

**TEAM**

- S1 opinions and experience of the reference doctor
- S2 opinions and experience of caregivers in this situation
- S3 the workload
- S4 patient attitude
- S5 my experience of the patient's situation

**ENVIRONMENT**

- E1 presence or absence of an emotional environment
- E2 quality of the integration of the patient in the institution
- E3 willingness of family
- E4 opinion of the person you trust
- E5 personal beliefs of family
- E6 level of confidence in the relationship between families and caregivers
- E7 feeling to be "force-feeding"
